# Supplementary material for: Bis(nitrate)diaquauranyl(vi) synthon to generate [1 × 2 + 1 × 1] and [1 × 1 + 1 × 1] co-crystalized 3d⋯5f self-assemblies
Source: Royal Society of Chemistry journal article supplement (doi:10.1039/c0ce00332h), 2010-11-01
Supplement: c0ce00332h.pdf [file c0ce00332h.pdf]

## Electronic supplementary information

for

**Bis(nitrate)diaquauranyl(VI) synthon to generate  $[1\times 2+1\times 1]$  and  $[1\times 1+1\times 1]$  cocrystalized 3d...5f self-assemblies**

Sagarika Bhattacharya, Suraj Mondal, Sujit Sasmal, Hazel A. Sparkes, Judith A. K. Howard, **Malabika Nayak** and Sasankasekhar Mohanta\*

**Table S1**

Bond angles (°) in the coordination environments of uranium(VI) in **1–4**.  
 Symmetry codes: A (for **1**), 1-x, 1-y, 1-z; A (for **2**), 1-x, -y, 1-z;  
 A (for **3**), -x, 1-y, 2-z; D (for **4**), 0.5-x, 0.5-y, 1-z

| Compound | Bond angles     |           |
|----------|-----------------|-----------|
| <b>1</b> | O(5)–U(1)–O(5A) | 180       |
|          | O(7)–U(1)–O(7A) | 180       |
|          | O(8)–U(1)–O(8A) | 180       |
|          | O(9)–U(1)–O(9A) | 180       |
|          | O(5)–U(1)–O(7)  | 50.71(9)  |
|          | O(5)–U(1)–O(7A) | 129.29(9) |
|          | O(5)–U(1)–O(8)  | 90.62(11) |
|          | O(5)–U(1)–O(8A) | 89.38(11) |
|          | O(5)–U(1)–O(9)  | 64.68(9)  |
|          | O(5)–U(1)–O(9A) | 115.32(9) |
|          | O(7)–U(1)–O(8)  | 91.42(11) |
|          | O(7)–U(1)–O(8A) | 88.58(11) |
|          | O(7)–U(1)–O(9)  | 115.34(9) |
|          | O(7)–U(1)–O(9A) | 64.66(9)  |
|          | O(8)–U(1)–O(9)  | 91.55(11) |
|          | O(8)–U(1)–O(9A) | 88.45(11) |
| <b>2</b> | O(5)–U(1)–O(5A) | 180       |
|          | O(7)–U(1)–O(7A) | 180       |
|          | O(8)–U(1)–O(8A) | 180       |
|          | O(9)–U(1)–O(9A) | 180       |
|          | O(5)–U(1)–O(7)  | 51.15(5)  |
|          | O(5)–U(1)–O(7A) | 128.85(5) |
|          | O(5)–U(1)–O(8)  | 92.07(7)  |
|          | O(5)–U(1)–O(8A) | 87.93(7)  |
|          | O(5)–U(1)–O(9)  | 63.96(6)  |
|          | O(5)–U(1)–O(9A) | 116.04(6) |
|          | O(7)–U(1)–O(8)  | 85.84(7)  |
|          | O(7)–U(1)–O(8A) | 94.16(7)  |
|          | O(7)–U(1)–O(9)  | 114.60(6) |
|          | O(7)–U(1)–O(9A) | 65.40(6)  |
|          | O(8)–U(1)–O(9)  | 89.43(7)  |
|          | O(8)–U(1)–O(9A) | 90.57(7)  |
| <b>3</b> | O(5)–U(1)–O(5A) | 180       |
|          | O(7)–U(1)–O(7A) | 180       |
|          | O(8)–U(1)–O(8A) | 180.      |
|          | O(9)–U(1)–O(9A) | 180.      |
|          | O(5)–U(1)–O(7)  | 51.04(7)  |
|          | O(5)–U(1)–O(7A) | 128.96(7) |
|          | O(5)–U(1)–O(8)  | 92.13(8)  |
|          | O(5)–U(1)–O(8A) | 87.87(8)  |
|          | O(5)–U(1)–O(9)  | 64.22(7)  |
|          | O(5)–U(1)–O(9A) | 115.78(7) |
|          | O(7)–U(1)–O(8)  | 86.54(8)  |
|          | O(7)–U(1)–O(8A) | 93.46(8)  |
|          | O(7)–U(1)–O(9)  | 114.88(7) |
|          | O(7)–U(1)–O(9A) | 65.12(7)  |
|          | O(8)–U(1)–O(9)  | 89.72(9)  |
|          | O(8)–U(1)–O(9A) | 90.28(9)  |

|   |                 |           |
|---|-----------------|-----------|
| 4 | O(3)-U(1)-O(3D) | 180       |
|   | O(4)-U(1)-O(4D) | 180       |
|   | O(6)-U(1)-O(6D) | 180       |
|   | O(7)-U(1)-O(7D) | 180       |
|   | O(3)-U(1)-O(4)  | 50.55(7)  |
|   | O(3)-U(1)-O(4D) | 129.45(7) |
|   | O(3)-U(1)-O(6)  | 93.95(9)  |
|   | O(3)-U(1)-O(6D) | 86.05(9)  |
|   | O(3)-U(1)-O(7)  | 65.60(7)  |
|   | O(3)-U(1)-O(7D) | 114.40(7) |
|   | O(4)-U(1)-O(6)  | 88.74(10) |
|   | O(4)-U(1)-O(6D) | 91.26(10) |
|   | O(4)-U(1)-O(7)  | 115.58(7) |
|   | O(4)-U(1)-O(7D) | 64.42(7)  |
|   | O(6)-U(1)-O(7)  | 87.74(9)  |
|   | O(6)-U(1)-O(7D) | 92.26(9)  |
